# Supplementary material for: Barriers to and facilitators of implementation of the integration of oncology and palliative care in daily practice: a systematic review
Source: Research Square preprint supplement (doi:10.21203/rs.3.rs-421082/v1), 2021-04-23
Supplement: Supplementary file 1 [file aaf59b5addfa9f61dbf0ef13.docx]

Additional Table 2. Literature Search Strategy

| Ovid MEDLINE 30/05/2017 | | |
| --- | --- | --- |
| 1 | exp Palliative Care/ | 49192 |
| 2 | exp Neoplasms/ | 3005710 |
| 3 | exp "Delivery of Health Care, Integrated"/ | 10662 |
| 4 | 1 and 2 and 3 | 77 |
| 5 | ((integration$ or integrate$ or integrati$ or early or earli$) adj5 (palliative or supportive) adj20 (cancer$ or tumor$ or tumour$ or neoplas$ or malignan$ or carcinoma$ or oncolog$)).tw. | 699 |
| 6 | 4 or 5 | 734 |
| EMBASE 03/06/2017 | | |
| S1 | (EMB.EXACT.EXPLODE("palliative therapy")) | 97598* |
| S2 | EMB.EXACT.EXPLODE("neoplasm") | 4173841* |
| S3 | (EMB.EXACT.EXPLODE("integrated health care system")) | 9199* |
| S4 | S1 AND S2 AND S3 | 56° |
| S5 | (TI,AB((integration* or integrate* or integrati* or early or earli*) n/5 (palliative or supportive) n/20 (cancer* or tumor* or tumour* or neoplas* or malignan* or carcinoma* or oncolog*))) | 1900° |
| S6 | S4 OR S5 | 1934° |
| CINAHL 03/06/2017 | | |
| S1 | (MH "Palliative Care" OR MH "Hospice and Palliative Nursing") | 25,548 |
| S2 | (MH "Neoplasms+") | 222,165 |
| S3 | (MH "Health Care Delivery, Integrated") | 5,699 |
| S4 | (S1 AND S2 AND S3) | 26 |
| S5 | TI ( (integration* or integrate* or integrati* or early or earli*) n5 (palliative or supportive) n20 (cancer* or tumor* or tumour* or neoplas* or malignan* or carcinoma* or oncolog*) ) OR AB ( (integration* or integrate* or integrati* or early or earli*) n5 (palliative or supportive) n20 (cancer* or tumor* or tumour* or neoplas* or malignan* or carcinoma* or oncolog*) ) | 352 |
| S6 | S4 OR S5 | 366 |
