# Supplementary material for: Barriers to and facilitators of implementation of the integration of oncology and palliative care in daily practice: a systematic review
Source: Research Square preprint supplement (doi:10.21203/rs.3.rs-421082/v1), 2021-04-23
Supplement: Supplementary file 2 [file c2324933494288991a9e2d39.docx]

Additional Table 3. Final literatures in the review

| **Final literature list included in the review** |
| --- |
| 1. Currow DC. Integrating cancer and supportive services: The progress and the challenges. Cancer Forum. 2002;26(1):3-4.  2. Malin JL. Bridging the divide: integrating cancer-directed therapy and palliative care. Journal of clinical oncology : official journal of the American Society of Clinical Oncology. 2004;22(17):3438-40.  3. Rodriguez KL, Barnato AE, Arnold RM. Perceptions and utilization of palliative care services in acute care hospitals. Journal of palliative medicine. 2007;10(1):99-110.  4. Kierner KA, Gartner V, Bartsch R, Hladschik-Kermer B, Gruber A, Hassler M, et al. Attitudes towards palliative care in primary metastatic cancer: a survey among oncologists. Wiener klinische Wochenschrift. 2010;122(1-2):45-9.  5. Manitta VJ, Philip JAM, Cole-Sinclair MF. Palliative care and the hemato-oncological patient: can we live together? A review of the literature. Journal of palliative medicine. 2010;13(8):1021-5.  6. Wiebe LA, Von Roenn JH. Working with a palliative care team. Cancer journal (Sudbury, Mass). 2010;16(5):488-92.  7. Gaertner J, Wolf J, Ostgathe C, Toepelt K, Glossmann JP, Hallek M, et al. Specifying WHO recommendation: moving toward disease-specific guidelines. Journal of palliative medicine. 2010;13(10):1273-6.  8. Dalal S, Palla S, Hui D, Nguyen L, Chacko R, Li Z, et al. Association between a name change from palliative to supportive care and the timing of patient referrals at a comprehensive cancer center. The oncologist. 2011;16(1):105-11.  9. Von Roenn JH. Palliative care and the cancer patient: current state and state of the art. Journal of pediatric hematology/oncology. 2011;33 Suppl 2:S87-9.  10. Gaertner J, Wolf J, Hallek M, Glossmann J-P, Voltz R. Standardizing integration of palliative care into comprehensive cancer therapy--a disease specific approach. Supportive care in cancer : official journal of the Multinational Association of Supportive Care in Cancer. 2011;19(7):1037-43.  11. Abernethy AP, Currow DC. Time for better integration of oncology and palliative care. Journal of oncology practice / American Society of Clinical Oncology. 2011;7(6):346-8.  12. Gaertner J, Wuerstlein R, Klein U, Scheicht D, Frechen S, Wolf J, et al. Integrating Palliative Medicine into Comprehensive Breast Cancer Therapy - a Pilot Project. Breast care (Basel, Switzerland). 2011;6(3):215-20.  13. Gaertner J, Wuerstlein R, Ostgathe C, Mallmann P, Harbeck N, Voltz R. Facilitating Early Integration of Palliative Care into Breast Cancer Therapy. Promoting Disease-Specific Guidelines. Breast Care (Basel). 2011;6(3):240-4.  14. Hauser J, Sileo M, Araneta N, Kirk R, Martinez J, Finn K, et al. Navigation and palliative care. Cancer. 2011;117(15 Suppl):3585-91.  15. Bruera E, Hui D. Conceptual models for integrating palliative care at cancer centers. Journal of palliative medicine. 2012;15(11):1261-9.  16. Abrahm JL. Integrating palliative care into comprehensive cancer care. Journal of the National Comprehensive Cancer Network : JNCCN. 2012;10(10):1192-8.  17. Reyes-Gibby CC, Anderson KO, Shete S, Bruera E, Yennurajalingam S. Early referral to supportive care specialists for symptom burden in lung cancer patients: a comparison of non-Hispanic whites, Hispanics, and non-Hispanic blacks. Cancer. 2012;118(3):856-63.  18. Bruera E, Yennurajalingam S. Palliative care in advanced cancer patients: how and when? The oncologist. 2012;17(2):267-73.  19. Thoonsen B, Engels Y, van Rijswijk E, Verhagen S, van Weel C, Groot M, et al. Early identification of palliative care patients in general practice: development of RADboud indicators for PAlliative Care Needs (RADPAC). Br J Gen Pract. 2012;62(602):e625-31.  20. Smith CB, Nelson JE, Berman AR, Powell CA, Fleischman J, Salazar-Schicchi J, et al. Lung cancer physicians' referral practices for palliative care consultation. Annals of oncology : official journal of the European Society for Medical Oncology / ESMO. 2012;23(2):382-7.  21. Epstein AS, Morrison RS. Palliative oncology: identity, progress, and the path ahead. Annals of oncology : official journal of the European Society for Medical Oncology. 2012;23 Suppl 3:43-8.  22. Von Roenn JH, Voltz R, Serrie A. Barriers and approaches to the successful integration of palliative care and oncology practice. JNCCN Journal of the National Comprehensive Cancer Network. 2013;11(SUPPL.1):S11-S6.  23. Howie L, Peppercorn J. Early palliative care in cancer treatment: rationale, evidence and clinical implications. Ther Adv Med Oncol. 2013;5(6):318-23.  24. Bakitas M, Lyons KD, Hegel MT, Ahles T. Oncologists' perspectives on concurrent palliative care in a National Cancer Institute-designated comprehensive cancer center. Palliative & supportive care. 2013;11(5):415-23.  25. Ramchandran K, Von Roenn JH. Palliative care always. Oncology (Williston Park, NY). 2013;27(1):13-passim.  26. Davis MP, Bruera E, Morganstern D. Early integration of palliative and supportive care in the cancer continuum: challenges and opportunities. Am Soc Clin Oncol Educ Book. 2013:144-50.  27. Glare PA. Early implementation of palliative care can improve patient outcomes. J Natl Compr Canc Netw. 2013;11 Suppl 1:S3-9.  28. Alesi ER, Fletcher DS. Integrating palliative care into oncology care: confronting the barriers. Oncology (Williston Park, NY). 2013;27(1).  29. Kwon JH, Hui D, Chisholm G, Ha C, Yennurajalingam S, Kang JH, et al. Clinical characteristics of cancer patients referred early to supportive and palliative care. Journal of palliative medicine. 2013;16(2):148-55.  30. Maciasz RM, Arnold RM, Chu E, Park SY, White DB, Vater LB, et al. Does it matter what you call it? A randomized trial of language used to describe palliative care services. Supportive care in cancer : official journal of the Multinational Association of Supportive Care in Cancer. 2013;21(12):3411-9.  31. Greer JA, Jackson VA, Meier DE, Temel JS. Early integration of palliative care services with standard oncology care for patients with advanced cancer. CA Cancer J Clin. 2013;63(5):349-63.  32. Lopez-Acevedo M, Lowery WJ, Lowery AW, Lee PS, Havrilesky LJ. Palliative and hospice care in gynecologic cancer: a review. Gynecol Oncol. 2013;131(1):215-21.  33. Vergo MT, Cullinan AM. Joining together to improve outcomes: integrating specialty palliative care into the care of patients with cancer. Journal of the National Comprehensive Cancer Network : JNCCN. 2013;11 Suppl 4:S38-46.  34. Le BH, Mileshkin L, Doan K, Saward D, Spruyt O, Yoong J, et al. Acceptability of early integration of palliative care in patients with incurable lung cancer. Journal of palliative medicine. 2014;17(5):553-8.  35. Charalambous H, Pallis A, Hasan B, O'Brien M. Attitudes and referral patterns of lung cancer specialists in Europe to Specialized Palliative Care (SPC) and the practice of Early Palliative Care (EPC). BMC palliative care. 2014;13(1):59.  36. Dalgaard KM, Bergenholtz H, Nielsen ME, Timm H. Early integration of palliative care in hospitals: A systematic review on methods, barriers, and outcome. Palliative & supportive care. 2014;12(6):495-513.  37. Schenker Y, Crowley-Matoka M, Dohan D, Rabow MW, Smith CB, White DB, et al. Oncologist factors that influence referrals to subspecialty palliative care clinics. Journal of oncology practice / American Society of Clinical Oncology. 2014;10(2):e37-44.  38. Del Ferraro C, Ferrell B, Van Zyl C, Freeman B, Klein L. Improving Palliative Cancer Care. J Adv Pract Oncol. 2014;5(5):331-8.  39. Ferrell BR, Smith TJ, Levit L, Balogh E. Improving the quality of cancer care: implications for palliative care. Journal of palliative medicine. 2014;17(4):393-9.  40. Gerbino S. Chronic cancer: bringing palliative care into the conversation. Social work in health care. 2014;53(1):74-80.  41. Zhi WI, Smith TJ. Early integration of palliative care into oncology: evidence, challenges and barriers. Annals of palliative medicine. 2015;4(3):122-31.  42. Fassbender K, Watanabe SM. Early palliative care and its translation into oncology practice in Canada: barriers and challenges. Annals of palliative medicine. 2015;4(3):135-49.  43. Davis MP, Strasser F, Cherny N. How well is palliative care integrated into cancer care? A MASCC, ESMO, and EAPC Project. Supportive care in cancer : official journal of the Multinational Association of Supportive Care in Cancer. 2015;23(9):2677-85.  44. Ramchandran K, Tribett E, Dietrich B, Von Roenn J. Integrating Palliative Care Into Oncology: A Way Forward. Cancer control : journal of the Moffitt Cancer Center. 2015;22(4):386-95.  45. LeBlanc TW, O'Donnell JD, Crowley-Matoka M, Rabow MW, Smith CB, White DB, et al. Perceptions of palliative care among hematologic malignancy specialists: a mixed-methods study. Journal of oncology practice / American Society of Clinical Oncology. 2015;11(2):e230-8.  46. Gaertner J, Maier BO, Radbruch L. Resource allocation issues concerning early palliative care. Annals of palliative medicine. 2015;4(3):156-61.  47. LeBlanc TW, El-Jawahri A. When and why should patients with hematologic malignancies see a palliative care specialist? Hematology American Society of Hematology Education Program. 2015;2015:471-8.  48. Thomas AA, Carver A. Essential competencies in palliative medicine for neuro-oncologists. Neuro-Oncology Practice. 2015;2(3):151-7.  49. Hui D, Bruera E. Models of integration of oncology and palliative care. Annals of palliative medicine. 2015;4(3):89-98.  50. Beernaert K, Deliens L, Pardon K, Van den Block L, Devroey D, Chambaere K, et al. What Are Physicians' Reasons for Not Referring People with Life-Limiting Illnesses to Specialist Palliative Care Services? A Nationwide Survey. PLoS One. 2015;10(9):e0137251.  51. Ammari ABH, Hendriksen C, Rydahl-Hansen S. Recruitment and Reasons for Non-Participation in a Family-Coping-Orientated Palliative Home Care Trial (FamCope). Journal of psychosocial oncology. 2015;33(6):655-74.  52. Kain DA, Eisenhauer EA. Early integration of palliative care into standard oncology care: evidence and overcoming barriers to implementation. Current oncology (Toronto, Ont). 2016;23(6):374-7.  53. Dailey E. The Evidence Behind Integrating Palliative Care Into Oncology Practice. Clinical journal of oncology nursing. 2016;20(4):368-70.  54. Gu X, Cheng W, Chen M, Liu M, Zhang Z. Timing of referral to inpatient palliative care services for advanced cancer patients and earlier referral predictors in mainland China. Palliative & supportive care. 2016;14(5):503-9.  55. Hui D, Bruera E. Integrating palliative care into the trajectory of cancer care. Nat Rev Clin Oncol. 2016;13(3):159-71.  56. Janssens A, Teugels L, Kohl S, Michielsen T, Leysen B, van Meerbeeck JP. Practical tools for implementing early palliative care in advanced lung cancer. Eur Respir J. 2016;47(3):1010-2.  57. Hui D, Meng Y-C, Bruera S, Geng Y, Hutchins R, Mori M, et al. Referral Criteria for Outpatient Palliative Cancer Care: A Systematic Review. The oncologist. 2016;21(7):895-901.  58. Kamal AH, Kaufmann T. Making the Right Thing Easier to Do: Standardized Integration of Oncology and Palliative Care. Journal of oncology practice. 2017;13(5):291-2.  59. Rauenzahn SL, Schmidt S, Aduba IO, Jones JT, Ali N, Tenner LL. Integrating Palliative Care Services in Ambulatory Oncology: An Application of the Edmonton Symptom Assessment System. Journal of oncology practice / American Society of Clinical Oncology. 2017;13(4):e401-e7.  60. Hoerger M, Perry LM, Gramling R, Epstein RM, Duberstein PR. Does Educating Patients About the Early Palliative Care Study Increase Preferences for Outpatient Palliative Cancer Care? Findings From Project EMPOWER. Health Psychol. 2017. |
| **Excluded literature list after full-text review** |
| 1. Bruera E, Hui D. Conceptual models for integrating palliative care at cancer centers. Journal of palliative medicine. 2012;15(11):1261-9. (Duplicate)  2. Pfeil, T.A., Laryionava, K., Reiter‐Theil, S., Hiddemann, W. and Winkler, E.C. (2015), What Keeps Oncologists From Addressing Palliative Care Early on With Incurable Cancer Patients? An Active Stance Seems Key. The Oncologist, 20: 56-61.  3. Chan, Wl., Lam, Ko., Siu, Wk. et al. Chemotherapy at end-of-life: an integration of oncology and palliative team. Support Care Cancer 24, 1421–1427 (2016). https://doi.org/10.1007/s00520-015-3031-z  4. Cynthia FC. To live until you die Clin J Oncol Nurs 2010;14(1):53-6.  5. Hydeman J. Improving the Integration of Palliative Care in a Comprehensive Oncology Center: Increasing Primary Care Referrals to Palliative Care. OMEGA - Journal of Death and Dying. 2013;67(1-2):127-134. doi:10.2190/OM.67.1-2.o  6. Dudgeon D, Vaitonis V, Seow H, King S, Angus H, Sawka C. Ontario, Canada: using networks to integrate palliative care province-wide. J Pain Symptom Manage. 2007;33(5):640-4. |
